# Supplementary material for: Genome-Wide Identification and Expression Analysis of BBX Transcription Factors in Iris germanica L
Source: MDPI journal article supplement (doi:10.3390/ijms22168793), 2021-08-17
Supplement: s1 [file s1]

Supplementary Materials:

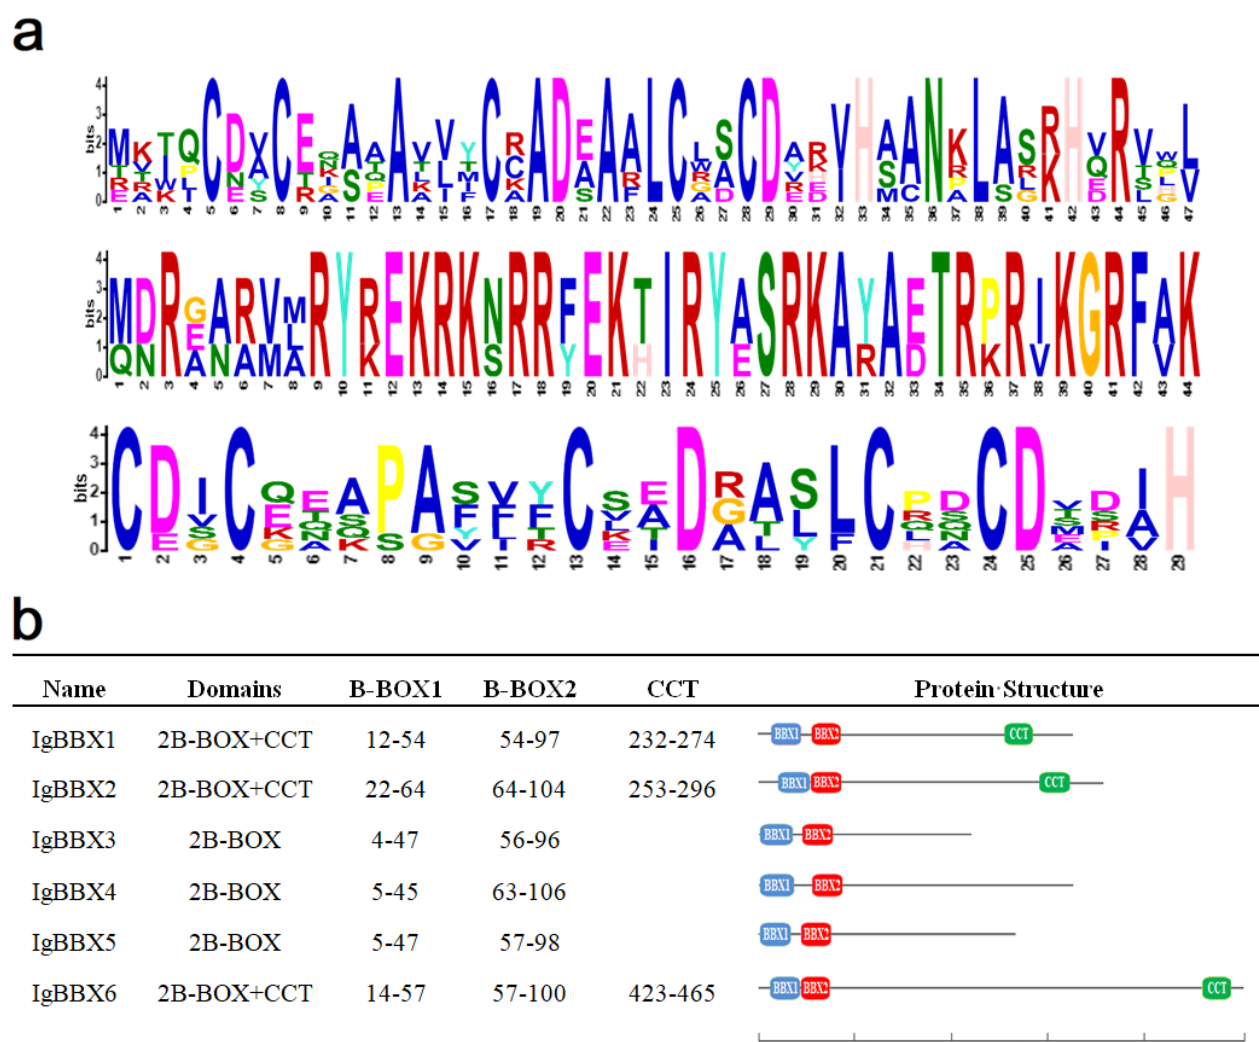

**Figure S1.** Conserved domains and structures of IgBBX proteins. (a) The conserved domains in the IgBBX proteins. (b)

Structure of the IgBBX proteins. The scale bar represents 100 amino acids.

**Table S1.** PCR primer sequences utilized in this study

| Primer Name | Sequence (5' to 3')                       | Annotation                                 |
|-------------|-------------------------------------------|--------------------------------------------|
| AP          | AAGCAGTGGTATCAACGCAGAGTAC                 | Universal primers                          |
| dT-AP       | AAGCAGTGGTATCAACGCAGAGTACTTTTTTTTTTTTTTTT | for 3' RACE                                |
| AUAP        | GGCCACGCGTCGACTAGTAC                      | Universal primers                          |
| AAP         | GGCCACGCGTCGACTAGTACGGGIIIGGGIIIGGGIIIG   | for 5' RACE                                |
| IgBBX1-F    | TTCTGGGGACTGTGCGCT                        | Amplify a fragment<br>of the <i>IgBBXs</i> |
| IgBBX1-R    | TGGCGAACCTTCCCTTGAT                       |                                            |
| IgBBX2-F    | GGGAGGAGGAGAGAGGAGCTA                     |                                            |

|                        |                                     |                                         |
|------------------------|-------------------------------------|-----------------------------------------|
| <b>IgBBX2-R</b>        | CCTGTTCTTTCTCTTCTCCCTGTA            |                                         |
| <b>IgBBX3-F</b>        | GTAAGAGAGAGTGTGTGGGCG               |                                         |
| <b>IgBBX3-R</b>        | ATGTTAGGTCCAGGTTATTCCCA             |                                         |
| <b>IgBBX4-F</b>        | GAGATGAAGATACAGTGCAACGC             |                                         |
| <b>IgBBX4-R</b>        | GGTTCTCGTGGAAGTCGTAGG               |                                         |
| <b>IgBBX5-F</b>        | GATACAAATGTGATGCATGCGA              |                                         |
| <b>IgBBX5-R</b>        | CATCATCGTCAGCAATCTCG                |                                         |
| <b>IgBBX6-F</b>        | GTTTCGCTGCTCCACCGAC                 |                                         |
| <b>IgBBX6-R</b>        | TTGACGAAACGGCCCTTTA                 |                                         |
| <b>IgBBX1-ORF-F</b>    | AACTCACTAATAATGGAGAAGGGC            |                                         |
| <b>IgBBX1-ORF-R</b>    | CTCACTGGCAGTGGTCACTCA               |                                         |
| <b>IgBBX2-ORF-F</b>    | ATGGCATCTAGAGAAGCAGAGGGA            |                                         |
| <b>IgBBX2-ORF-R</b>    | TCAGAAGGAGGGGACAATTCCATAT           |                                         |
| <b>IgBBX3-ORF-F</b>    | GAGAGAGTAGAGGAGAGTGTGTGG            |                                         |
| <b>IgBBX3-ORF-R</b>    | CACATTACATTCTGAAGGGCTC              | ORF of <i>IgBBXs</i>                    |
| <b>IgBBX4-ORF-F</b>    | TACACACATAACGAAAGATAGGAAA           |                                         |
| <b>IgBBX4-ORF-R</b>    | CGGACCGAGAAAGTAGCCTAG               |                                         |
| <b>IgBBX5-ORF-F</b>    | AGAGATGAAGATACAATGTGATGCA           |                                         |
| <b>IgBBX5-ORF-R</b>    | ACGACATCGATATACATAATCATGC           |                                         |
| <b>IgBBX6-ORF-F</b>    | TTTTGAGCACGGGAGCGA                  |                                         |
| <b>IgBBX6-ORF-R</b>    | CAGCAGAACTAGCCACCAGTCTC             |                                         |
| <b>UBC9-F</b>          | CCGACAATCTCCCACAAACA                |                                         |
| <b>UBC9-R</b>          | GATGATCCGTTGGTTCCAGAG               |                                         |
| <b>IgBBX1-RT-F</b>     | TATAGCTCCTACGCTGCCAAT               |                                         |
| <b>IgBBX1-RT-R</b>     | GTATCGTCTTCTCGAACCGC                |                                         |
| <b>IgBBX2-RT-F</b>     | CAGCAGACCACTAAGCCAGTT               |                                         |
| <b>IgBBX2-RT-R</b>     | ATTGACACTTCAGCCATTGC                |                                         |
| <b>IgBBX3-RT-F</b>     | AGGCAGAGGGTTGAGTTTCC                | qRT-PCR for <i>IgBBXs</i>               |
| <b>IgBBX3-RT-R</b>     | TCGGTAAGGTCTCATGTTGAGAT             |                                         |
| <b>IgBBX4-RT-F</b>     | AAGTAAGCAAGGACGGTAACCT              |                                         |
| <b>IgBBX4-RT-R</b>     | GCCTACCACTATCCGCCTTA                |                                         |
| <b>IgBBX5-RT-F</b>     | TGTCTGATCCTGAGTCATGTGAC             |                                         |
| <b>IgBBX5-RT-R</b>     | ATCGTCAGCAATCTCGGTTC                |                                         |
| <b>IgBBX6-RT-F</b>     | GGGATTTTAATCTTGACGAAC               |                                         |
| <b>IgBBX6-RT-R</b>     | AGGTCACCTGTAACCTTTGATCGTAA          |                                         |
| <b>IgBBX1-EcoR I-F</b> | GGAATTCCAACCTCACTAATAATGGAGAAGGGC   | Vector construction of<br><i>IgBBXs</i> |
| <b>IgBBX1-BamH I-R</b> | CGGGATCCCGCTCACTGGCAGTGGTCACTCA     |                                         |
| <b>IgBBX2-EcoR I-F</b> | GGAATTCATGGCATCTAGAGAAGCAGAGGGA     |                                         |
| <b>IgBBX2-BamH I-R</b> | CGGGATCCCGTCAGAAGGAGGGGACAATTCCATAT |                                         |
| <b>IgBBX3-EcoR I-F</b> | GGAATTCGAGAGAGTAGAGGAGAGTGTGTGG     |                                         |
| <b>IgBBX3-BamHI-R</b>  | CGGGATCCCGCACATTACATTCTGAAGGGCTC    |                                         |
| <b>IgBBX4-EcoR I-F</b> | GGAATTCTACACACATAACGAAAGATAGGAAA    |                                         |

---

|                        |                                     |
|------------------------|-------------------------------------|
| <b>IgBBX4-BamH I-R</b> | CGGGATCCCGCGGACCGAGAAGTAGCCTAG      |
| <b>IgBBX5-EcoR I-F</b> | GGAATTCAGAGATGAAGATACAATGTGATGCA    |
| <b>IgBBX5-BamH I-R</b> | CGGGATCCCGACGACATCGATATACATAATCATGC |
| <b>IgBBX6-EcoR I-F</b> | GGAATTCTTTTGAGCACGGGAGCGA           |
| <b>IgBBX6-Pst I-R</b>  | GCTGCAGCCAGCAGAACTAGCCACCAGTCTC     |

---
